# Supplementary figures and images for: Harnessing Pentameric Scaffold of Cholera Toxin B (CTB) for Design of Subvirion Recombinant Dengue Virus Vaccine
Source: MDPI journal article supplement (doi:10.3390/vaccines12010092), 2024-01-17

Supplementary Figure S1

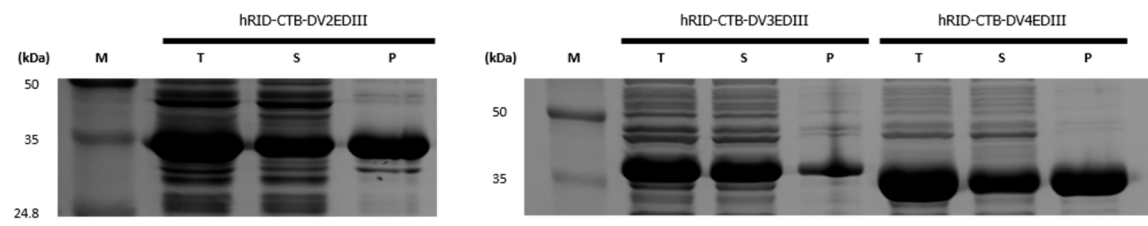

Supplementary Figure S2

### CTB-DV1EDIII

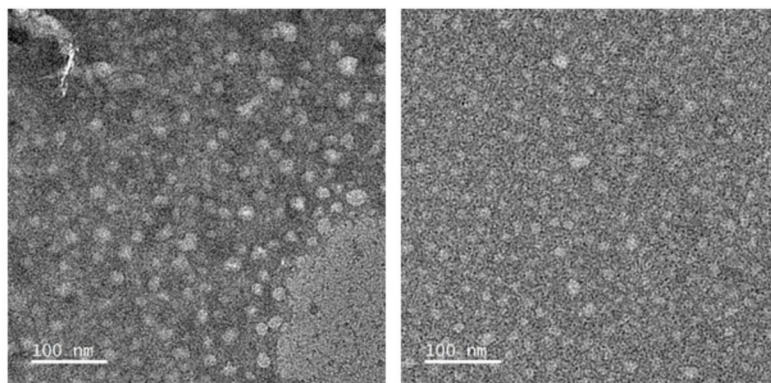

### mCTB(C9S)-DV1EDIII

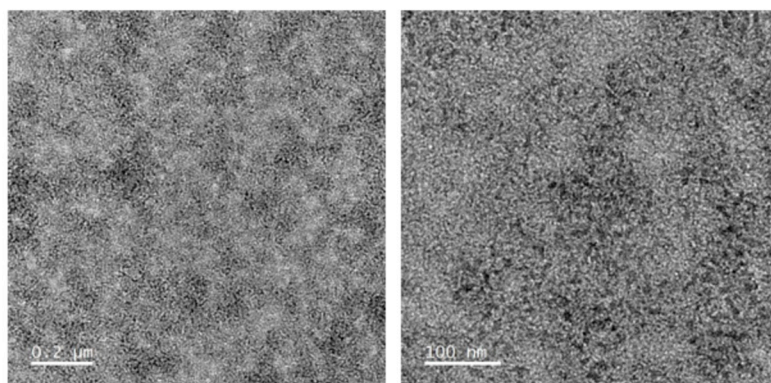

Supplement: s1 [file s1]
